# Supplementary material for: The Power of Far-Red Light at Night: Photomorphogenic, Physiological, and Yield Response in Pepper During Dynamic 24 Hour Lighting
Source: Frontiers journal article supplement (doi:10.3389/fpls.2022.857616), 2022-04-26
Supplement: Data_Sheet_1.PDF [file Data_Sheet_1.PDF]

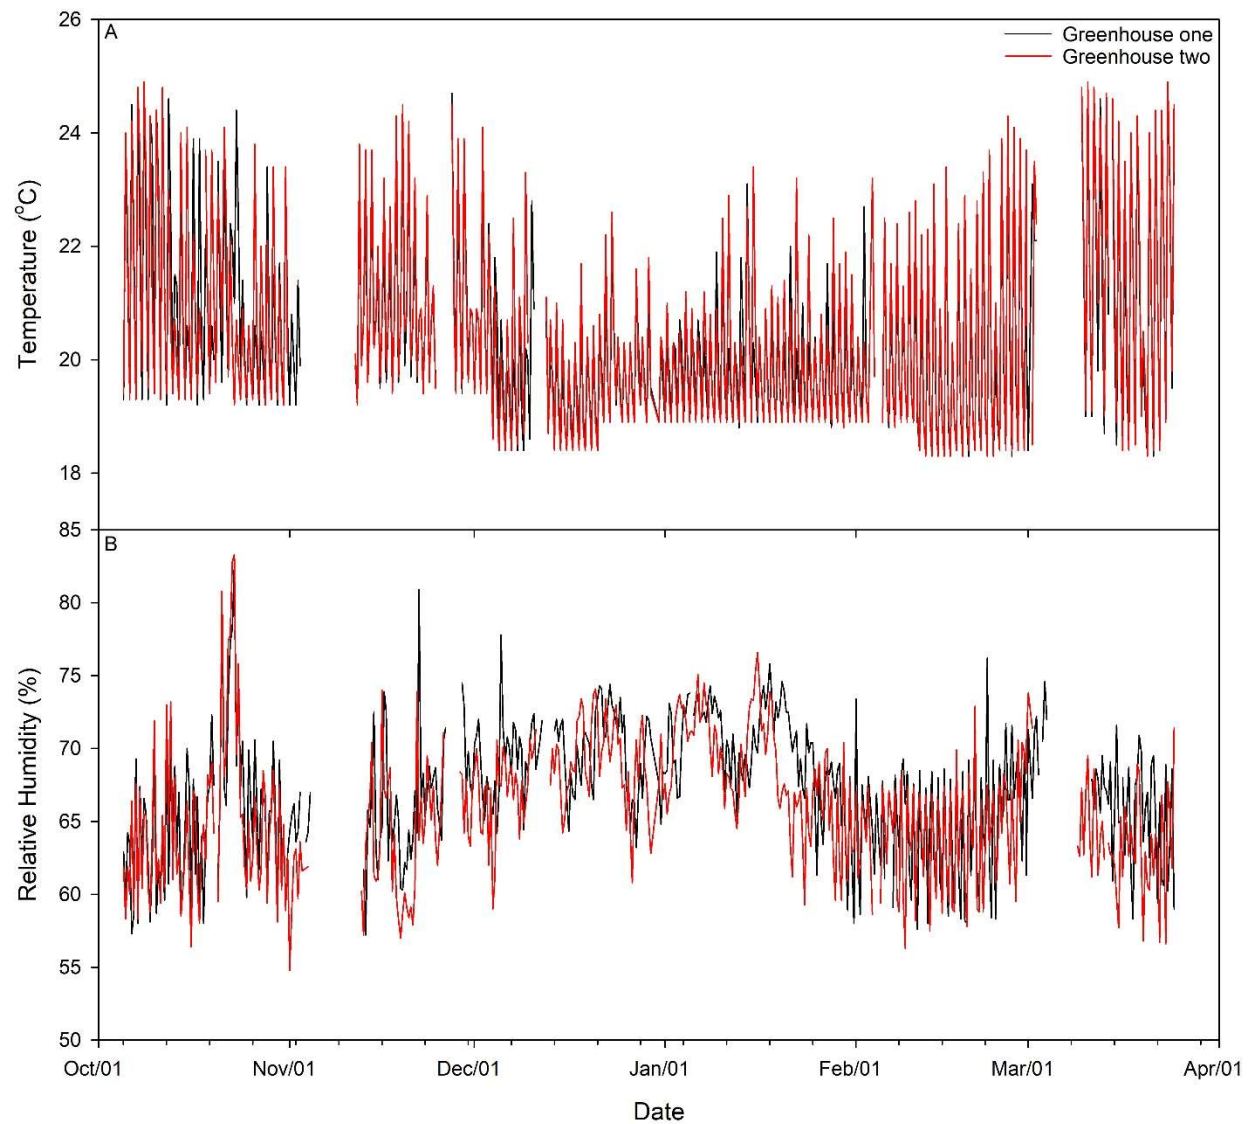

**Supplementary Figure 1:** Temperature (A) and relative humidity (B) inside both greenhouses during experiment one (October 5<sup>th</sup>, 2020 – March 24<sup>th</sup>, 2021).

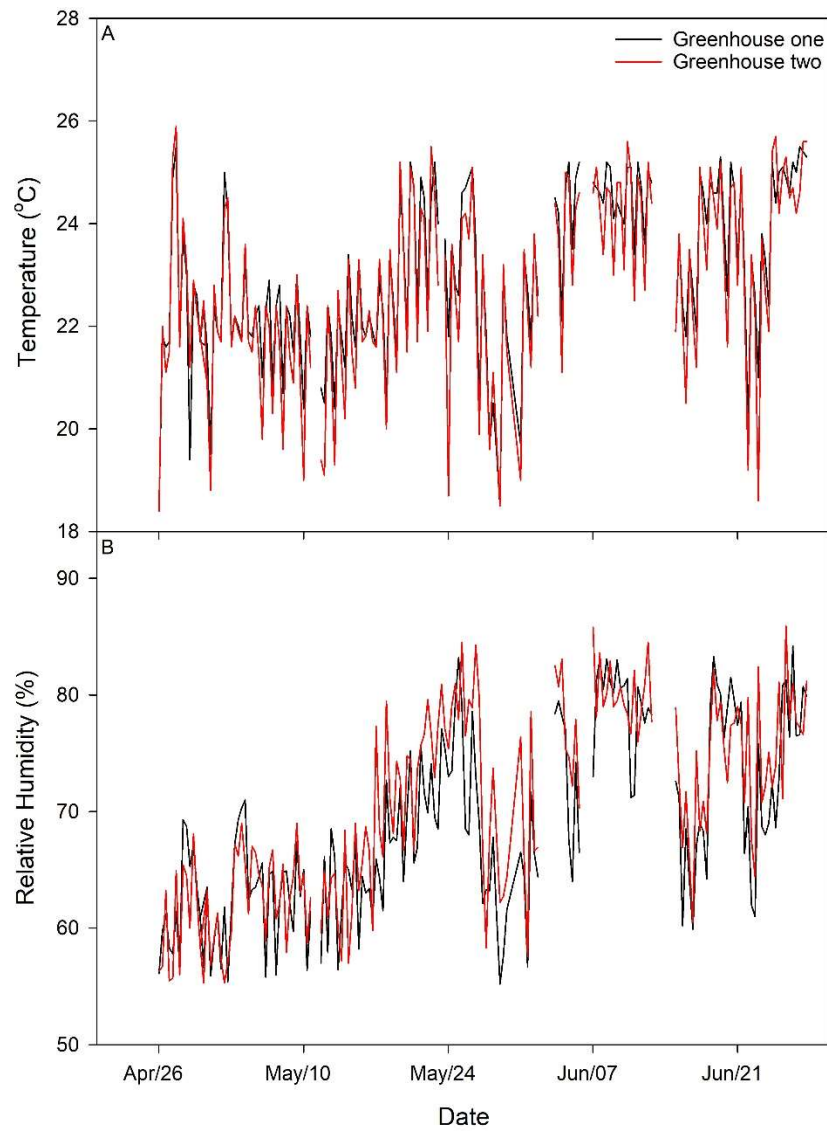

**Supplementary Figure 2:** Temperature (A) and relative humidity (B) inside both greenhouses during experiment two (April 26<sup>th</sup>, 2021 – June 30<sup>th</sup>, 2021).
